# Supplementary material
Source: PubMed Central journal article supplement (PMC30164)
Supplement: pnas_041616098_1.pdf [file pnas_041616098_1.pdf]

**Table 3.** Individual bone  $\delta^{13}\text{C}$  values for archaeological sites on the High Plains

| Site | ID   | $\delta^{13}\text{C}$ |
|------|------|-----------------------|
| CKM  | 2    | -18.62                |
| CKM  | 8    | -19.46                |
| CKM  | 10   | -17.77                |
| CKM  | 22   | -17.45                |
| CKM  | 23   | -16.80                |
| CKM  | 28   | -17.85                |
| CKM  | 33   | -18.81                |
| ABF  | 462  | -18.00                |
| ABF  | 463  | -15.55                |
| ABF  | 467  | -18.58                |
| ABF  | 479  | -15.89                |
| ABF  | 481  | -18.11                |
| ABF  | 482  | -17.47                |
| ABF  | 486  | -17.88                |
| ABF  | 489  | -18.11                |
| ABF  | 900  | -17.53                |
| ABF  | 1783 | -18.52                |
| ABF  | 1785 | -18.16                |
| ABF  | 4047 | -18.87                |
| ABF  | 4051 | -17.54                |
| ABAB | 466  | -18.94                |
| ABAB | 465  | -17.99                |
| ABAB | 2606 | -18.81                |
| ABAB | 2630 | -18.55                |
| ABAB | 2792 | -18.86                |
| ABAB | 2793 | -18.67                |
| ABAB | 2797 | -18.31                |
| ABAB | 3110 | -17.67                |
| ABAB | 5020 | -17.37                |
| ABAB | 5023 | -19.07                |
| ABAB | 5047 | -19.02                |
| ABAB | 6834 | -19.32                |
| ABHG | 1103 | -17.69                |
| ABHG | 2779 | -16.44                |
| ABHG | 3455 | -17.21                |
| ABHG | 3458 | -15.68                |
| ABHG | 3462 | -16.88                |
| ABHG | 3463 | -17.42                |
| ABHG | 3480 | -16.20                |
| ABHG | 4049 | -18.16                |

|      |      |        |
|------|------|--------|
| ABHG | 4398 | -18.83 |
| ABHG | 4402 | -15.74 |
| ABHG | 4050 | -12.59 |
| HK   | 42   | -18.04 |
| HK   | 47   | -12.89 |
| HK   | 57   | -15.54 |
| HK   | 58   | -18.08 |
| HK   | 59   | -15.31 |
| HK   | 67   | -17.80 |
| HK   | 78   | -15.56 |
| HK   | 22   | -17.84 |
| HK   | 40   | -10.56 |
| HK   | 41   | -14.70 |
| HK   | 45   | -15.55 |
| HK   | 46   | -16.60 |

---

ID, bone identification number.
